# Supplementary material
Source: MDPI journal article supplement (https://www.mdpi.com/2071-1050/9/3/421)
Supplement: s1 [file s1]

To whom it may concern:

This memo is to certify that the paper titled “A Framework of Sustainable Service Supply Chain Management: A Literature Review and Research Agenda” has been edited for language and style by WordsRU.

Our international paper editing service is performed by a subject expert editor and approved by a senior editor. All our editors are native English speakers.

The certificate is being issued upon the request of the client. If you have any questions, please contact [sarahn@wordsru.com](mailto:sarahn@wordsru.com).

Signature of the editor representative,



Sarah Norton  
Chief Editor, WordsRU
